# Supplementary material for: Interannual variations of water vapor in the tropical uppertroposphere and the lower and middle stratosphere and theirconnections to ENSO and QBO
Source: Copernicus journal article supplement (doi:10.5194/acp-2018-1010), 2018-12-05

We appreciate Dr. Hegglin and two anonymous referees for their constructive and insightful comments. We have revised and improved our paper based on these comments listed in *blue italic font* below. Our detailed responses to these comments are described and listed in black regular font below. The page numbers are based on the revised version in the tracked change form.

#### Response to Dr. Hegglin

*A paper by Diallo et al. (2018) recently published in ACP discusses the combined influence of QBO and ENSO on the UTLS water vapour and ozone distributions using a lagged multiple regression analysis. A reference to this paper should be included along with a discussion of the added scientific value of the results presented here.*

*Diallo, M. et al. (2018) Response of stratospheric water vapor and ozone to the unusual timing of El Niño and the QBO disruption in 2015–2016. Atmospheric Chemistry and Physics, 18 (17). pp. 13055-13073.*

We have referenced this relevant study and discussed the added scientific value of our results relative to this and other references. Please see the added text on pages 7, 19 and 22 in the revised version.

#### Response to Anonymous Referee #1

##### *1 Summary*

*This paper reports on the impact of ENSO and QBO on tropical UTLS and MS water vapor (WV) variability in the tropics using a longer observational data record from MLS. The paper can be followed easily, however, there are some serious issues and some clarifications needed. Most of the results (Figs 1-4) are not very new and basically confirming previous studies, only Fig. 5 showing the composite anomalies for the different combination of QBO (easterly/westerly) and ENSO phases (warm/cold) are nice results but not unexpected.*

We have resolved and clarified the serious issues the referee raised. Please see our response to the major issues below.

##### *2 Major issues*

- When talking of time lag between QBO and WV, this lag is here defined with the respect to the 30 hPa QBO index. This may differ for QBO indices at other altitude levels. A quantitative statement is needed how the lag changes when changing the pressure level of the QBO index. The comparison with previous studies are hampered as the latter apparently mostly used the 50 hPa index. So it would be recommendable to use the 50hPa index. The authors did not provide a justification why the 30hPa QBO index was their preferred choice.*

We have performed additional analyses, replotted Figs. 1, 3, 4 and 5 and revised our paper accordingly using the 50-hPa QBO index downloaded from the NOAA CPC website. The changes can be found through the paper. For example, we have added the following discussions on page 1: “The phase lag is based on the 50-hPa QBO index used by many previous studies.”

We have added the following discussions on page 11:

“For QBO, we use the standardized anomaly of monthly zonal mean zonal wind at the Equator and 50-hPa ( $u_{50}$ ,  $m\ s^{-1}$ ) based on the National Centers for Environmental Prediction (NCEP) / National Center for Atmospheric Research (NCAR) reanalysis (CDAS) downloaded from NOAA NCEP Climate Prediction Center (CPC) website (<http://www.cpc.ncep.noaa.gov/data/indices/qbo.u50.index>). Positive  $u_{50}$  values denote westerly QBO phases while negative  $u_{50}$  values denote easterly QBO phases. This 50-hPa QBO index has been frequently used by previous studies (Dessler et al., 2013; 2014; Ye et al., 2018).”

*• A weakness of the paper is that the the linear regression is mainly done with respect to QBO and ENSO only. This is reasonable for obtaining the optimized time lag. The  $r^2$  values barely reach 0.5 for each of the indices alone, so it would be interesting to have a more complete multiple regression attempting to explain more completely the WV variances (as compared to the MLR limited to QBO and ENSO). It is evident from Fig. 4 that the residuals (after removing the QBO and ENSO components) still show large variances. A more complete MLR with additional factors may enhance the detectability of the QBO and ENSO factors, when they are rather weak. In the introduction the effect of the BDC is mentioned as one important factor for WV variability. Even though BDC is related to QBO, the Dressler et al. 2014 paper gets a high correlation in their regression model combining BDC, QBO, and ENSO (or Delta T) with observations at least for 82 hPa.*

We agree that the paper would be enhanced if a more complete Multiple Linear Regression (MLR) with additional factors, such as the Brewer-Dobson Circulation (BDC), as suggested by this referee. However, we feel this is out of the scope of this study for the following reasons. First, the main purpose of this paper to highlight the relative roles of ENSO and QBO in the interannual variations of water vapor in the tropical UTLMS layer at different levels. Second, there are many factors that impact the interannual variations of the tropical UTLMS water vapor, such as ENSO, QBO, BDC, Hadley circulation, aerosols, and methane. Thus, it is difficult to perform a complete MLR with all contributing factors. For example, Dessler et al. (2014) has shown that a more complete MLR including ENSO, QBO and BDC can get a higher correlation but only increase the R-squared value to about 0.7-0.8, still less than perfect. Third, the ENSO and QBO indices have been well constrained observationally and used extensively. In contrast, the BDC index is usually inferred indirectly from the behavior of material tracers and is plagued by large uncertainties (Butchart, 2014). Thus, the regression based on the BDC may contain inherent errors. Due to the above reasons, we prefer a linear regression based on ENSO and QBO only in this paper and a more complete MLR with additional factors can be deferred to future studies.

### *3 Minor issues*

*p. 1, l. 20: "The phase lag is based on the 30-hPa QBO index and should be different from that found by previous studies based on the 50-hPa QBO index" The results presented in the paper regarding the phase lag should be reported in a way that can be directly compared with previous studies, so I strongly suggest to use the 50-hPa QBO index instead (see major comments).*

We have resolved this issue. Please see our response to major issue above.

*p. 2., l. 12: Another good reference on the strong water vapor feedback is Riese et al. (doi:10.1029/2012JD017751, 2012, see their Fig. 1)*

We have added this reference. Please see changes on page 2 in the revised version.

*p. 3., l. 19: "... impact on the tropical UTLMS water vapor is mainly through the QBO's influence on the tropical tropopause temperature that regulates the amount of upper tropospheric water vapor entering the stratosphere". Here it would be good to mention that the BDC plays a role here as well since the QBO modulates the extratropical wave activity, an important driver for the BDC, that influences the tropical cold point tropopause temperature.*

We have added the following discussions "It is also noted that the QBO modulates the extratropical wave activity, an important driver for the BDC, which influences the tropical cold point tropopause temperature." Please see changes on page 5 in the revised version. We have also added some discussions on BDC on pages 3 and 4.

*p. 4., l. 4: "They found that the evaporation of convective ice from increased deep convection as the troposphere warms plays an important role in the tropopause water vapor variability". The sentence before suggests that this was derived from MLR applied to observations, but indeed Ye et al. (2014) used a combination of observations and models to come to this conclusion.*

We have added 'based on satellite observations and model simulations' in the sentence before the sentence "They found...". Please see changes on page 6 in the revised version.

*p. 6, l. 21: The MEI ENSO index is a two-month average, whence it is a lagged index itself. This should be mentioned here.*

We have added 'The MEI is computed separately for each of twelve sliding bi-monthly seasons (Dec/Jan, Jan/Feb, ..., Nov/Dec). We use the MEI value of month(i-1) and month(i) as if it were the value for month(i) only as advised by the MEI author.' Please see changes on page 11 in the revised version.

*p. 8, l. 14: "monthly mean tropical water vapor anomalies" (add "mean")*

We have added 'mean'. Please see changes on page 13 in the revised version.

*p. 8, l. 25: "... may be regulated by QBO" Is there any doubt that QBO is one of the main driver of this variability, so I suggest to use something else than "may be".*

We have changed 'may be' to 'are'. Please see changes on page 13 in the revised version.

*p. 10, l. 16: change "suggests" to "confirms" (as this is in agreement with earlier studies).*

We have changed 'suggests' to 'confirms'. Please see changes on page 15 in the revised version.

*p. 10, l. 24: " as result of the impact from the QBO". One should mention here that BDC also plays a role here (see my earlier comment).*

We have added 'It is possible that the interannual variations of the BDC play a role here too because the QBO modulates the extratropical wave activity, an important driver for the BDC, which influences the tropical cold point tropopause temperature.' Please see changes on page 15 in the revised version.

*p. 11, l. 18: change "by mainly QBO instead of ENSO" to "mainly by the QBO"*

Corrected. Please see changes on page 16 in the revised version.

*p. 11, l. 23: discussion of the green line in Figure 4. As discussed in the major points, the residuals show large variability, so an improved MLR could minimize this variance and improve the signal from the QBO and ENSO, where they are weak.*

Please see our response to major issue above.

*p. 12, l. 7: "This issue is beyond the scope of this paper and will be investigated in the future." I disagree here as this should be done here to improve the paper (see major comments).*

Please see our response to major issue above.

*p. 12, l. 22: "interannual tropical water vapor anomalies tend to be larger" (add "be")*

Corrected. Please see changes on page 18 in the revised version.

*Fig. 1: units for the wind is missing, "standard departure" should be replaced by "standard deviation".*

we have replotted Fig.1 using new data of the 50-hPa QBO index and added 'MEI' and '50-hPa QBO Index (m/s)' in the y-axis titles. Please see changes on Fig.1 in the revised version.

*Fig. 3.: physical units (months) for shifts are missing, color legend has no label (r2).*

We have replotted Fig.3 using new data of the 50-hPa QBO index and based on this suggestion. Please see changes on Fig.3 in the revised version.

## Response to Anonymous Referee #2

*The manuscript by E.W. Tian et al is a very focused study on an interesting, however, very narrow, topic which is in the scope of ACP. The paper is, on the whole, well organized and written in a very clear style. Some major issues I raised in the context of the initial submission have been successfully remedied before this discussion paper has been resubmitted. My major concern is that the predictors analyzed (ENSO and QBO) explain only a fraction of the observed H2O anomalies and, in more general terms, that only incremental new evidence is provided for relations between ENSO and QBO, which, as far as I can judge, have been known before. To make the paper acceptable for ACP, it will be necessary to highlight which new insights have been gained.*

We have highlighted new insights gained from the current study in the introduction and conclusion. For example, we have added the following discussions on page 8: "This study distinguishes itself from previous similar studies in three following ways: (1) The current study investigates the interannual variations of water vapor in the whole tropical UTLMS layer from 215 hPa to 6 hPa instead of a couple of layers in the previous ones. (2) The Aura MLS UTLMS water vapor data of much longer length (August 2004 to September 2017) are used in the current study than the previous ones. (3) The relative importance of ENSO and QBO on the tropical UTLMS water vapor interannual variabilities for the entire UTLMS layer and at different phase lags are more completely investigated in the current study than the previous ones."

*More specifically: On p4 122-24 it is stated that "some fundamental physical or dynamical processes controlling UTLMS water vapor and its variability are not well represented or even missing in the climate models and reanalyses". However, since only about half of the H2O anomalies is explained by QBO and ENSO (p12 13-4), the results do not provide any clue what the key to solving the problem with the models and reanalyses actually is.*

We have deleted this paragraph. Please see changes on page 8 in the revised version.

*p. 5 l. 19: Are these uncertainties 1 sigma or two sigma? Are these uncertainties used in the manuscript? Do these uncertainties survive the averaging process mentioned on p. 6 l4 because they are chiefly systematic or are they random and thus cancel largely out during the averaging?*

We have added the following discussion on page 9 in the revised version:

"These measurement uncertainties are retrieval uncertainties and estimated based on (1) the average difference between the simulated retrieval and truth file; (2) the average difference between MLS measurements and the air borne measurements. These uncertainties should not affect our results because we are interested in the interannual anomalies instead of its means. In addition, Hegglin et al. (2013) show that MLS zonal monthly mean water vapor show very

good to excellent agreement with the multi-instrument mean (MIM) in comparison between 13 instruments, throughout most of the atmosphere (including the UTLS) with mean deviations from the MIM between +2.5% and +5%, making these random errors irrelevant for the average monthly zonal mean water vapor anomalies used in this study (Diallo et al., 2018).”

*p. 6 | 10 -15: The method how short-handed anomalies are isolated through the difference between 12-month and 42-month running means is not clear to me.*

We have deleted a period that was misplaced in this sentence. Hope this sentence is clearer now to readers. Using the difference of running means of different widths as a band-pass filter is effective. A 12-month running mean will remove the high-frequency variabilities (<2 years) and keep the interannual variability (2-7 years) and the low-frequency variabilities (>7 years). A 42-month running mean will remove the high-frequency variabilities (<2 years) and the interannual variability (2-7 years) and keep the low-frequency variabilities (>7 years). As a result, the difference between the 12-month and 42-month running means will remove both the high-frequency (<2 years) variabilities and the low-frequency (>7 years) variabilities and keep the interannual variability (2-7 years) only. This simple approach of band pass filter has been used in the previous studies related to the Madden-Julian Oscillation (e.g., Tian et al., 2006; 2007; 2011). Please see the changes on page 10 in the revised version.

*On p. 7 | 13 a normalization of the indices is mentioned but the rationale behind this action is not clear. Isn't normalization implicit part of each correlation analysis?*

We agree that normalization is an implicit part of a correlation analysis and we do not need to perform the index normalization first if for a correlation analysis only or a univariate linear regression only. However, a multivariate linear regression with respect to ENSO and QBO together is also performed in this study. Thus, the normalized ENSO and QBO indices are needed. The normalization is also used in previous studies, such as Diallo et al. (2018).

*On p. 7 | 14 linear regression analysis is mentioned. Have the authors investigated if the relatively poor explanatory and predictive power of the regression model used might be due to the assumed linearity? Could it be that ENSO or QBO have nonlinear influence on water vapor? Only from the fact that linear correlation with ENSO and QBO indices do not satisfactorily explain the observation it cannot be concluded that other processes are needed. Nonlinear interaction or coupled ENSO-QBO interaction has not been ruled out.*

We agree that nonlinear or coupled ENSO-QBO interaction could be responsible for the unexplained variance of water vapor. However, we have not investigated on this issue yet. It is also possible other processes (e.g., BDC) and the non-linear interactions among ENSO, QBO and BDC could be responsible for the unexplained variance of water vapor. This issue is beyond the scope of this paper and will be investigated in the future. We stated this possibility in the paper on pages 12, 17 and 22 in the revised version.

*p9 l1-2: The explanation of small interannual water vapor anomalies at the first and last several months of the data record by limitations of the band pass filter is not very clear. Does this refer to the running means mentioned before? Is this simply a boundary effect occurring where the width of the filter exceeds the range where data are available? Isn't a running mean a low-pass filter rather than a band-pass filter?*

Yes, the band pass filter refers to the difference of running means mentioned on Section 2. This is simply a boundary effect occurring where the width of running means exceeds the range where data are available. A running mean is a low-pass filter rather a band-pass filter. However, as we explained earlier the difference of running means of different widths can act as a simple band-pass filter. Because of the boundary effect the running means will have no effect in the beginning and ending parts of time series. As a result, the difference of the running means will be very small. We have stated the following on page 13 in the revised version: "The small interannual water vapor anomalies at the beginning and ending months of the data record are results of the boundary effect and limitation of using the difference of running means as a band pass filter."

*p. 12 l 3-4 and elsewhere: The relation between  $R^{*2}$  and the explained variance holds only under certain assumptions (linearity, Gaussian distributions). A critical discussion of this issue is needed.*

The referee is right that the relation between  $R^{*2}$  and the explained variance is based on linearity and Gaussian distributions. Although we don't expect ENSO or QBO influences on the UTLMS water vapor are strictly linear, it is useful to assume the responses of water vapor are approximately proportional to the magnitudes of ENSO or QBO anomalies within the observable ranges of perturbations. It is also reasonable to assume the interannual anomalies of water vapor and ENSO or QBO have Gaussian distributions. We realized that these assumptions are not perfect but useful. We have added a couple of sentences to state the underlying assumptions on page 12 in the revised version.

## References

Butchart, N.: The Brewer-Dobson circulation, *Rev. Geophys.*, 52, 157-184, doi:10.1002/2013rg000448, 2014.

Dessler, A. E., Schoeberl, M. R., Wang, T., Davis, S. M., and Rosenlof, K. H.: Stratospheric water vapor feedback, *Proc. Nat. Acad. Sci. USA*, 110, 18087-18091, doi:10.1073/pnas.1310344110, 2013.

Dessler, A. E., Schoeberl, M. R., Wang, T., Davis, S. M., Rosenlof, K. H., and Vernier, J. P.: Variations of stratospheric water vapor over the past three decades, *J. Geophys. Res.*, 119, 12588-12598, doi:10.1002/2014jd021712, 2014.

Diallo, M., Riese, M., Birner, T., Konopka, P., Muller, R., Hegglin, M. I., Santee, M. L., Baldwin, M., Legras, B., and Ploeger, F.: Response of stratospheric water vapor and ozone to the unusual



timing of El Niño and the QBO disruption in 2015-2016, *Atm. Chem. Phys.*, 18, 13055-13073, doi:10.5194/acp-18-13055-2018, 2018.

Hegglin, M. I., Tegtmeier, S., Anderson, J., Froidevaux, L., Fuller, R., Funke, B., Jones, A., Lingenfelter, G., Lumpe, J., Pendlebury, D., Remsberg, E., Rozanov, A., Toohey, M., Urban, J., von Clarmann, T., Walker, K. A., Wang, R., and Weigel, K.: SPARC Data Initiative: Comparison of water vapor climatologies from international satellite limb sounders, *J. Geophys. Res.*, 118, doi:10.1002/jgrd.50752, 2013.

Tian, B., Waliser, D. E., Fetzer, E. J., Lambrigtsen, B. H., Yung, Y. L., and Wang, B.: Vertical moist thermodynamic structure and spatial-temporal evolution of the MJO in AIRS observations, *J. Atmos. Sci.*, 63, 2462-2485, doi:10.1175/jas3782.1, 2006.

Tian, B., Yung, Y. L., Waliser, D. E., Tyranowski, T., Kuai, L., Fetzer, E. J., and Irion, F. W.: Intraseasonal variations of the tropical total ozone and their connection to the Madden-Julian Oscillation, *Geophys. Res. Lett.*, 34, doi:10.1029/2007gl029451, 2007.

Tian, B., Waliser, D. E., Kahn, R. A., and Wong, S.: Modulation of Atlantic aerosols by the Madden-Julian Oscillation, *J. Geophys. Res.*, 116, 12, doi:10.1029/2010jd015201, 2011.

Ye, H., Dessler, A. E., and Yu, W. D.: Effects of convective ice evaporation on interannual variability of tropical tropopause layer water vapor, *Atm. Chem. Phys.*, 18, 4425-4437, doi:10.5194/acp-18-4425-2018, 2018.



# Interannual variations of water vapor in the tropical upper troposphere and the lower and middle stratosphere and their connections to ENSO and QBO

Edward W Tian<sup>1,2</sup>, Hui Su<sup>1</sup>, Baijun Tian<sup>1</sup>, and Jonathan H. Jiang<sup>1</sup>

5 <sup>1</sup>Jet Propulsion Laboratory, California Institute of Technology, Pasadena, CA, USA

<sup>2</sup>Department of Economics, University of California, Santa Cruz, CA, USA

*Correspondence to:* Dr. Jonathan Jiang (Jonathan.H.Jiang@jpl.nasa.gov)

**Abstract.** In this study, we analyze the Aura Microwave Limb Sounder water vapor data in the tropical upper troposphere and the lower and middle stratosphere (UTLMS) (from 215 hPa to  
10 6 hPa) for the period from August 2004 to September 2017 using time-lag regression analysis and composite analysis to explore the interannual variations of tropical UTLMS water vapor and their connections to El Nino Southern Oscillation (ENSO) and quasi-biennial oscillation (QBO). Our analysis shows that ENSO's impact on the interannual tropical water vapor anomalies is strong in the upper troposphere (~215 to ~120 hPa) and near the tropopause (~110  
15 to ~90 hPa) with a ~3-month lag but weak in the lower and middle stratosphere (~80 to ~6 hPa). In contrast, QBO has a large impact on the interannual tropical water vapor anomalies in the lower and middle stratosphere with an upward propagating signal starting at the tropopause (100 hPa) with a ~2-month lag, peaking in the middle stratosphere near 15 hPa with a ~21-month lag. The phase lag is based on the 50-hPa QBO index used by many previous studies.  
20 In the upper troposphere, interannual tropical water vapor anomalies are mainly determined by ENSO instead of QBO and they are positive during the warm ENSO phases but negative during the cold ENSO phases. Near the tropopause, both ENSO and QBO are important for the interannual tropical water vapor anomalies. Warm ENSO phase and westerly QBO phase tend to cause positive water vapor anomalies while cold ENSO phase and easterly QBO phase tend

**Deleted:** first in the lower stratosphere near 68 hPa with a ~7-month lag and then

**Deleted:** 4

**Deleted:** the 30-hPa QBO index and should be different from that found by previous studies based on

**Deleted:** no matter what QBO phases are

**Deleted:**

[to cause negative water vapor anomalies. As a result, the](#) interannual tropical water vapor anomalies [near the tropopause](#) are different depending on different ENSO and QBO phase combinations. In the lower and middle stratosphere, interannual tropical water vapor anomalies are mainly determined by QBO instead of ENSO. For the [westerly](#) QBO phases, interannual tropical water vapor anomalies are positive [near the tropopause and](#) in the lower stratosphere but negative in the middle stratosphere [and positive again above](#). Vice versa for the [easterly](#) QBO phases.

Deleted: a

Deleted: w

## 1 Introduction

Water vapor (WV) is the dominant greenhouse gas in the atmosphere and plays an important role in global weather and climate systems. Since higher temperature is associated with higher saturation vapor pressure, water vapor has a positive feedback to surface warming. Previous studies indicate that the water vapor feedback is the largest positive feedback in climate models that increases the sensitivity of surface temperature to increasing carbon dioxide (Held and Soden, 2000; Soden and Held, 2006). The middle and upper tropospheric water vapor dominates the water vapor feedback (e.g., Held and Soden, 2000; [Riese et al., 2012](#); Soden et al., 2008). The stratospheric water vapor may account for about 10% of total water vapor feedback (Dessler et al., 2013). In addition, the water vapor in the stratosphere plays an important role in stratospheric ozone chemistry and global radiative balance (Forster and Shine, 1999; Solomon et al., 2010). Thus, it is important to study the water vapor variability in the upper troposphere and the lower and middle stratosphere (UTLMS).

Formatted: Highlight

[The water vapor in the tropical upper troposphere is mainly from the tropical lower troposphere through convective transport of water vapor and evaporation of convectively-transported or in-situ-produced cloud ices](#) (e.g., Su et al., 2006; Tian et al., 2004). [The majority of the water](#)

vapor in the tropical lower and middle stratosphere (LMS) is from the tropical upper troposphere through the tropical tropopause. The tropical LMS water vapor concentration is thus mainly determined by the tropical tropopause (~100 hPa) temperature that regulates the amount of tropical upper tropospheric water vapor entering the tropical stratosphere (e.g., Fueglistaler et al., 2009; Liang et al., 2011; Randel et al., 2004; Zhou et al., 2001, 2004). Part of the water vapor in the tropical LMS is also from the local methane oxidation.

The water vapor in the tropical UTLMS exhibits multi-timescale variations ranging from daily to decadal (e.g., Fueglistaler et al., 2009; Fujiwara et al., 2010; Hegglin et al., 2014; Jiang et al., 2015; Mote et al., 1996; Schwartz et al., 2008; Solomon et al., 2010; Tian et al., 2004, 2006; 2010). In particular, large interannual variations of water vapor in the tropical UTLMS have been observed and shown to be important for both climate and chemical reasons (e.g., Dessler et al., 2013; 2014; Fueglistaler and Haynes, 2005; Liang et al., 2011; Liess and Geller, 2012; Randel and Jensen, 2013; Tao et al., 2015; Ye et al., 2018). Several well-known interannual climate variabilities and their interactions are found to modulate the interannual variations of tropical UTLMS water vapor, such as the El Niño Southern Oscillation (ENSO) (e.g., Dessler et al., 2014; Liang et al., 2011; Randel et al., 2004; Su and Jiang, 2013; Ye et al., 2018), the quasi-biennial oscillation (QBO) (e.g., Dessler et al., 2014; Fueglistaler and Haynes, 2005; Geller et al., 2002; Liang et al., 2011; Liess and Geller, 2012; Randel et al., 2004; Randel and Jensen, 2013; Tao et al., 2015; Ye et al., 2018), and the interannual variations in the strength of the Brewer–Dobson circulation (BDC) (e.g., Dessler et al., 2013; 2014; Randel et al., 2006; Ye et al., 2018).

The BDC is a slow stratospheric mean meridional circulation in which air parcels rise in the tropics, drift poleward into the stratosphere, and are transported downward in the high-latitude regions via its shallow and deep branches (Brewer, 1949; Butchart, 2014). The BDC is one of

Deleted: L

Deleted: mode

Deleted: modes

the few truly global-scale phenomena observed in the Earth's atmosphere below ~50 km. It is particularly prominent because of its widespread controlling influence on the stratosphere. For instance, it has important roles in determining the thermodynamic balance of the stratosphere, the temperature of the tropical tropopause, the water vapor entry into the stratosphere, the period of the tropical QBO, the lifetimes of CFCs and some greenhouse gases, and the transport and redistribution within the stratosphere of greenhouse gases, ozone, aerosols, volcanic and radioactive debris (Butchart, 2014). Driven by wave breaking in the stratosphere, the BDC varies on subseasonal to decadal timescales.

5

10 The QBO is a major mode of interannual variability in the tropical upwelling of the BDC (Baldwin et al., 2001; Lindzen and Holton, 1968). The QBO describes the quasi-biennial oscillation of downward propagating easterly or westerly zonal winds in the equatorial stratosphere from the middle stratosphere to the tropopause with a period of ~28 months (Baldwin et al., 2001). It is well known that the QBO causes large-scale circulation changes

15 that affect ozone, water vapor, methane and global weather and climate. The QBO's impact on the tropical UTLMS water vapor is mainly through the QBO's influence on the tropical tropopause temperature that regulates the amount of upper tropospheric water vapor entering the stratosphere (e.g., Fueglistaler et al., 2009; Liang et al., 2011; Randel et al., 2004; Zhou et al., 2001, 2004). Mostly driven by equatorially trapped waves, the QBO triggers an anomalous

20 meridional circulation in the stratosphere between the tropics and subtropics (from the equator to 30N and 30S) to maintain the thermal wind balance between the descending QBO wind shear and its temperature anomaly (Diallo et al., 2018; Tweedy et al., 2017). At the equator, westerly shear (westerlies aloft and easterlies below) is in balance with a downward-propagating and adiabatically warmed perturbation, while easterly shear (easterlies aloft and

25 westerlies below) produces an upward-propagating and adiabatically cooled perturbation. The tropical upwelling perturbation is anticorrelated with the tropical temperature perturbation in

**Deleted:** (Baldwin et al., 2001)

the lower stratosphere. The enhanced upwelling during easterly shear and reduced upwelling during westerly shear in the tropics are mass balanced by the changes in the subtropical descent. The circulation is “completed” by the equatorial divergence/convergence of air at the levels of maximum easterly/westerly winds (Choi et al., 2002). As the westerly shear reaches the tropopause, it warms the tropopause and increases the amount of the upper tropospheric water vapor entering the lower stratosphere. Conversely, as the easterly shear reaches the tropopause, it cools the tropopause and decreases the amount of the upper tropospheric water vapor entering the lower stratosphere (Diallo et al., 2018; Tweedy et al., 2017). It is also noted that the QBO modulates the extratropical wave activity, an important driver for the BDC, which influences the tropical cold point tropopause temperature.

Deleted: that

ENSO is the interannual oscillation (2-7 year) of sea surface temperatures (SSTs) and easterly trade winds in the tropical Pacific ocean, caused by the coupled interactions between the ocean and atmosphere (Wallace et al., 1998). It is the primary source of global interannual climate variabilities (Philander, 1990; Wallace et al., 1998). During a warm ENSO (El Niño) phase, trade winds are weaker and warm waters move eastward to the equatorial central and eastern Pacific. During a cold ENSO (La Niña) phase, trade winds are stronger and warm waters move further westward to the equatorial western Pacific. ENSO can modulate the tropical UTLMS water vapor through several physical and dynamical processes, such as convective transport of tropospheric water vapor, evaporation of cloud ice, and the perturbations of tropical tropopause (~100 hPa) temperature (e.g., Dessler et al., 2014; Gettelman et al., 2001; Liang et al., 2011; Ye et al., 2018; Zhou et al., 2001, 2004). In the tropical upper troposphere, ENSO modulates the water vapor mainly through the convective transport of lower tropospheric water vapor and evaporation of cloud ice. In the stratosphere including the tropopause region, ENSO modulates the water vapor mainly through its influence on the tropical tropopause temperature that regulates the amount of water vapor entering the stratosphere. From a zonal mean perspective,

Deleted: s

Deleted: -

Deleted: upper tropospheric

5 [El Niño events induce a tropospheric warming and a stratospheric cooling with a node near the tropopause, strengthen the tropical upwelling of the BDC, and decrease the tropical lower stratospheric ozone](#) (Calvo et al., 2010; Randel et al., 2009). [Lower stratospheric water vapor, however, is predominantly controlled by cold point temperatures over the tropical western Pacific](#) (Avery et al., 2017; Diallo et al., 2018). [El Niño events are associated with warmer cold point temperatures over this region, thereby causing increased lower stratospheric water vapor](#) (e.g., Avery et al., 2017; Calvo et al., 2010; Konopka et al., 2016). [In contrast, La Niña events induce an opposite effect.](#)

10 [Many previous studies have significantly improved our knowledge about the interannual variations of the tropical UTLMS water vapor. For example, Liang et al. \(2011\) studied the atmospheric water vapor and temperature variability in the tropical UTLMS using merged Aqua Atmospheric Infrared Sounder \(AIRS\) and Aura Microwave Limb Sounder \(MLS\) temperature and water vapor record \(August 2004 to March 2010\). They found that both ENSO and QBO impact the tropical tropopause water vapor and the water vapor anomalies near the tropical tropopause are strongly dependent on the alignment of ENSO and QBO phases.](#)

15 Dessler et al. (2013; 2014) performed a multi-linear regression of the tropical lower stratospheric (82-hPa) water vapor variability to the QBO, BDC and tropospheric temperature (which is correlated with ENSO). They found that the tropical lower stratospheric water vapor  
20 lags QBO by about 3 months and lags BDC by 1 month based on the 50-hPa QBO index. Ye et al. (2018) performed a two-dimensional multivariate linear regression of the tropical tropopause water vapor interannual variability to the QBO, BDC and tropospheric temperature as a function of latitude and longitude [based on satellite observations and model simulations.](#)  
25 They found that the evaporation of convective ice from increased deep convection as the troposphere warms plays an important role in the tropopause water vapor variability in addition to changing tropopause temperature. Ding and Fu (2018) found that the tropical central Pacific

Moved (insertion) [1]

Field Code Changed

Deleted: performed a study with such an objective

Deleted: but the data record was relatively short

SST warming contributes significantly to enhanced convection and thus sudden drop of the lower stratospheric (83-hPa) water vapor around 2000. They suggested that the tropical central Pacific SST is another important driver of the lower stratospheric water vapor variability on inter-decadal time scales.

5

[During the boreal winter 2015–2016, a strong El Niño event \(among the three strongest El Niño events on record\) \(Huang et al., 2016\) was aligned with a westerly QBO phase. This westerly QBO phase was abruptly disrupted well before completion by an easterly phase in January 2016 \(Newman et al., 2016; Osprey et al., 2016\). The interplay between, both circulation](#)

Deleted: of

10

[anomalies caused large changes in trace gas transport, the climate implications of which are currently a topic of debate. Avery et al. \(2017\) argued that the most recent El Niño event significantly moistened the lower stratosphere due to convective ice lofting, with the QBO having only a small contribution. In contrast, Tweedy et al. \(2017\) attributed the lower stratospheric water vapor changes from spring to autumn to the 2015–2016 QBO disruption.](#)

15

[Diallo et al. \(2018\) showed that the alignment of a strong El Niño event with westerly QBO in early boreal winter of 2015–2016 substantially increased water vapor in the tropical lower stratosphere \(positive anomalies of more than 20%\). The sudden shift in the QBO from westerly to easterly wind shear significantly decreased global lower stratospheric water vapor from early spring to late autumn and reversed the lower stratosphere moistening to the lower](#)

Formatted: Highlight

20

[stratosphere drying \(negative anomalies of close to 20%\). They emphasized that the control of the lower stratospheric water vapor anomalies strongly depends on the interactions between,](#)

Deleted: of

[ENSO and QBO phases. The interaction of El Niño and the westerly QBO phase leads to large positive lower stratospheric water vapor anomalies, while the interplay between La Niña and easterly QBO phase leads to negative water vapor anomalies. During weak and moderate](#)

Deleted: events

25

[ENSO events, the water vapor anomalies are mainly controlled by the QBO phase.](#)



However, the aforementioned studies mainly focused on a [few](#) specific level of the UTLMS layer, either 82 hPa (Dessler et al., 2013; 2014; Ding and Fu, 2018) or 100 hPa (Ye et al., 2018) [or based on limited data periods](#) (Avery et al., 2017; Diallo et al., 2018; Liang et al., 2011; Tweedy et al., 2017). A comprehensive investigation of the interannual variations of the tropical water vapor in the whole UTLMS layer [with a much longer period](#) and their relationships to ENSO and QBO is still lacking. [In addition, the relative importance of ENSO and QBO on the tropical UTLMS water vapor interannual variabilities at different levels has not been well investigated in the previous studies.](#)

10 This study seeks to investigate the interannual variations of water vapor in the tropical UTLMS layer and their relationships to ENSO and QBO using the Aura MLS UTLMS water vapor data. [We are particularly interested in the relative roles of ENSO and QBO in the interannual variations of water vapor in the tropical UTLMS layer at different levels. This study distinguishes itself from previous studies in three following ways: \(1\) The current study](#)

15 [investigates the interannual variations of water vapor in the whole tropical UTLMS layer from 215 hPa to 6 hPa instead of a couple of layers in the previous ones. \(2\) The Aura MLS UTLMS water vapor data of much longer length \(August 2004 to September 2017\) are used in the current study than the previous ones. \(3\) The relative importance of ENSO and QBO on the tropical UTLMS water vapor interannual variabilities for the entire UTLMS layer and at](#)

20 [different phase lags are more completely investigated in the current study than the previous ones.](#)

The rest of this paper is organized as follows. Section 2 describes the MLS water vapor data and the analysis methods. Section 3 presents the results followed by summary and conclusions

25 in Section 4.

**Moved up [1]:** Liang et al. (2011) performed a study with such an objective using merged Aqua Atmospheric Infrared Sounder (AIRS) and Aura Microwave Limb Sounder (MLS) temperature and water vapor record but the data record was relatively short (August 2004 to March 2010) in that study.

**Deleted:** ¶

¶ On the other hand, current state-of-the-art climate models have difficulties in reproducing the observed UTLMS water vapor spatial and temporal variations (e.g., Jiang et al., 2012; John and Soden, 2007; Takahashi et al., 2016; Tian et al., 2004; 2013). Large differences in the UTLMS water vapor have also been found between the satellite observations and the state-of-the-art reanalyses (Jiang et al., 2015). This implies that some fundamental physical or dynamical processes controlling the UTLMS water vapor and its variability are not well represented or even missing in the climate models and reanalyses. ¶

**Deleted:** (from 215 hPa to 6 hPa)

**Deleted:** the two well-known interannual climate modes, i.e.,

**Deleted:** ,

**Deleted:** of much longer length (August 2004 to September 2017) than previous studies, in order to better understand the physical and dynamical processes that control the tropical UTLMS water vapor and its variability

**Deleted:** ¶

## 2 Data and Methods

We use Version 4.2 Level 2 daily Aura MLS water vapor volume mixing ratio product as described in Read et al. (2007) and Livesey (2015) from 215 hPa to 6 hPa over the period of August 2004 to September 2017. The MLS water vapor data were averaged to monthly means and gridded onto 2.5x2.5 horizontal spatial grids. The MLS Level 2 data have a vertical resolution of ~3 km and horizontal resolutions of ~7 km across track and ~200–300 km along track. The useful altitude ranges are at pressure ( $p$ )  $\leq$  316 hPa but we only use the water vapor data above 215 hPa because of larger uncertainty below 215 hPa altitude. The measurement uncertainties (including biases) are 20% in the upper troposphere ( $p > 100$  hPa) and 10% near the tropopause (~100 hPa) and in the stratosphere ( $p \leq 100$  hPa) (Lambert et al., 2007; Read et al., 2007). [These measurement uncertainties are retrieval uncertainties and estimated based on \(1\) the average difference between the simulated retrieval and truth file; \(2\) the average difference between MLS measurements and the air borne measurements. These uncertainties should not affect our results because we are interested in the interannual anomalies instead of its means. In addition, Hegglin et al. \(2013\) show that MLS zonal monthly mean water vapor show very good to excellent agreement with the multi-instrument mean \(MIM\) in comparison between thirteen instruments, throughout most of the atmosphere \(including the UTLS\) with mean deviations from the MIM between +2.5% and +5%, making these random errors irrelevant for the average monthly zonal mean water vapor anomalies used in this study](#) (Diallo et al., 2018). The Aura MLS water vapor data have been used extensively in atmospheric process analysis studies and climate model evaluations (e.g., Dessler et al., 2013; 2014; Flury et al., 2012; Jiang et al., 2012; Liang et al., 2011; Liu et al., 2018; Solomon et al., 2010; Su et al., 2006; Takahashi et al., 2016; Uma et al., 2014; Wu et al., 2012). The MLS water vapor data are freely available through the Aura MLS project website (<https://mls.jpl.nasa.gov>).

25

Since we are mainly interested in the tropical UTLMS, we first averaged the MLS monthly water vapor data between 15°S/N, and along the entire latitude band ( $wv_{t,p}$ ). Then, the tropical mean seasonal cycle ( $wv_{m,p}$ , 12 months) was calculated as the averages of the tropical MLS monthly water vapor data at each calendar month over the whole MLS data record. Next, de-seasonalized monthly tropical water vapor anomalies were obtained by removing the tropical mean seasonal cycle from the tropical monthly water vapor data ( $wv'_{t,p} = wv_{t,p} - wv_{m,p}$ ). Then, the interannual (2-7 years) tropical water vapor anomalies (or short-handed as anomalies for simplicity) were isolated through the difference between the 12-month and 42-month running means of the de-seasonalized monthly tropical water vapor anomalies to remove the high-frequency (e.g., synoptic, seasonal, intraseasonal, and annual) and low-frequency (e.g., solar cycle and decadal) variabilities. Last, the interannual monthly tropical water vapor anomalies were converted into percentage deviations through dividing the interannual monthly tropical water vapor anomalies by the long-term tropical mean ( $wv_p$ ) at the respective pressure level. The resulting interannual monthly tropical water vapor anomalies in percentage deviations are used throughout the analysis.

**Deleted:**

**Deleted:** (e.g., Ding and Fu, 2018; Mote et al., 1996; Schieferdecker et al., 2015; Schwartz et al., 2008; Solomon et al., 2010)

**Deleted:** (e.g., Tian et al., 2006)

Using the difference of running means of different widths as a band-pass filter is effective. A 12-month running mean will remove the high-frequency variabilities (<2 years) and keep the interannual variability (2-7 years) and the low-frequency variabilities (>7 years). A 42-month running mean will remove the high-frequency variabilities (<2 years) and the interannual variability (2-7 years) and keep the low-frequency variabilities (>7 years). As a result, the difference between the 12-month and 42-month running means will remove both the high-frequency (<2 years) and low-frequency (>7 years) variabilities and keep the interannual variability (2-7 years) only. This simple approach of band-pass filter has been used in the previous studies related to the Madden-Julian Oscillation (e.g., Tian et al., 2006; 2007; 2011).

To represent ENSO phases, we use a bimonthly multivariate ENSO index (MEI) [downloaded](#) from National Oceanic and Atmospheric Administration (NOAA) [Earth System Research Laboratory \(ESRL\) website](#) (<https://www.esrl.noaa.gov/psd/enso/mei/>). [After spatially filtering the individual fields into clusters, the MEI is calculated as the first unrotated Principal Component \(PC\) of all six observed fields combined including](#) sea-level pressure, zonal and meridional surface winds, sea surface temperature, surface air temperature, and total cloudiness [over the tropical Pacific collected and published in International Comprehensive Ocean-Atmosphere Data Set \(ICOADS\)](#) (Wolter and Timlin, 2011). Positive MEI values indicate warm ENSO (El Niño) phases while negative MEI values indicate cold ENSO (La Niña) phases.

[In order to keep the MEI comparable, all seasonal values are standardized with respect to each season and to the 1950-93 reference period. The MEI is computed separately for each of twelve sliding bi-monthly seasons \(Dec/Jan, Jan/Feb, ..., Nov/Dec\). We use the MEI value of month\(i-1\) and month\(i\) as if it were the value for month\(i\) only as advised by the NOAA MEI website.](#)

For QBO, we use the [standardized anomaly of monthly zonal mean zonal wind at the Equator and 50-hPa \( \$u\_{50}\$ ,  \$m\ s^{-1}\$ \) based on the National Centers for Environmental Prediction \(NCEP\) / National Center for Atmospheric Research \(NCAR\) reanalysis \(CDAS\) downloaded from NOAA NCEP Climate Prediction Center \(CPC\) website \(<http://www.cpc.ncep.noaa.gov/data/indices/qbo.u50.index>\)](#). Positive  $u_{50}$  values denote westerly QBO phases while negative  $u_{50}$  values denote easterly QBO phases. [This 50-hPa QBO index has been frequently used by previous studies \(Dessler et al., 2013; 2014; Ye et al., 2018\). The ENSO and QBO indices from August 2004 to September 2017 are shown in Fig. 1.](#)

With the ENSO, QBO, and MLS data sets we conducted two types of analysis: lead-lag regression analysis and composite analysis. The lead-lag regression identifies how much time lag exists between the perturbation of a climate mode and the response of the UTLMS water

**Deleted:** The MEI is based on

**Deleted:** 30-hPa

**Deleted:**  $u_{30}$

**Deleted:** (<https://www.esrl.noaa.gov/psd/data/correlation/qbo.data>)

**Deleted:** based on the NCEP/NCAR reanalysis

**Deleted:**  $u_{30}$

**Deleted:**  $u_{30}$

**Deleted:** ere

**Deleted:** is a ~3-month phase lag between the

**Deleted:** at 30 hPa and the QBO index based on the monthly 50-hPa zonal mean zonal wind at the Equator

**Deleted:** other

**Deleted:** Thus, the phase lag between the UTLMS water vapor anomalies and QBO in this study should be different from those found by previous studies based on the 50-hPa QBO index.

vapor anomalies at different pressure levels. We normalized each index by dividing each index anomaly by its standard deviation before performing the linear regressions. For every pressure level and time shift, a univariate linear regression is performed first with respect to either ENSO or QBO index individually ( $WV = X_0 + X_1 \times ENSO$  and  $WV = X_0 + X_1 \times QBO$ ). The respective R-squared value of each linear regression, a standard measure of explained variance, is used to indicate how much water vapor variability can be described by each regression separately for each pressure level and time lag. The maximum R-squared value will determine the optimal time lag for the univariate linear regression at each pressure level. A multivariate linear regression with respect to ENSO and QBO together is then performed using the optimal time lags obtained from the univariate linear regressions to estimate how much water vapor variability can be described by ENSO and QBO combined. The residual between the original observation and the multivariate linear regression with respect to ENSO and QBO together is also calculated to quantify how much water vapor variability that cannot be explained by ENSO and QBO together and may be due to nonlinear or coupled ENSO-QBO interaction and other physical processes (e.g., BDC). We recognize that using the R-squared value of linear regressions as the explained variance is based on the assumptions of linearity and the Gaussian distributions of perturbations. Within the observed interannual anomalies of the UTLMS water vapor and climate variabilities, these assumptions are not perfect but useful.

For the composite analysis, we first partitioned the interannual monthly MLS water vapor anomalies into four different cases based on different combinations of ENSO and QBO phases: warm ENSO ( $MEI > 0.3$ ) and westerly QBO ( $\mu 50 > 0.1 \text{ m s}^{-1}$ ) case, warm ENSO ( $MEI > 0.3$ ) and easterly QBO ( $\mu 50 < -0.1 \text{ m s}^{-1}$ ) case, cold ENSO ( $MEI < -0.3$ ) and westerly QBO ( $\mu 50 > 0.1 \text{ m s}^{-1}$ ) case, and cold ENSO ( $MEI < -0.3$ ) and easterly QBO ( $\mu 50 < -0.1 \text{ m s}^{-1}$ ) case. These threshold values were chosen in order to remove the ENSO and QBO neutral phases and have sufficient samples for the composites at the same time. We then averaged the interannual

Deleted: approximately valid

Deleted: u30

Deleted: 3

Deleted: u30

Deleted: 3

Deleted: u30

Deleted: 3

Deleted: u30

Deleted: 3

monthly MLS water vapor anomalies for each case to create a composite mean profile. The composite analysis was applied to the MLS interannual water vapor anomaly data for annual means, the summer months (MJJASO) average and the winter months (NDJFMA) average separately.

### 5 3 Results

Figure 2 shows the interannual monthly [mean](#) tropical water vapor anomalies from MLS in percentage deviations at different pressure levels [from 215 hPa to 6 hPa and](#) from August 2004 to September 2017. In the upper troposphere from ~215 hPa to ~120 hPa, large vertically oriented tropical water vapor anomalies of  $\pm 15\%$  are evident. They seem to be coincident with several El Nino or La Nina events shown in Fig. 1 with positive anomalies during the warm ENSO phases and negative anomalies during the cold ENSO phases. In the lower and middle stratosphere (100-6 hPa), large tropical water vapor anomalies of  $\pm 15\%$  are found to propagate upward at a speed of about 7 km per year starting around 100 hPa with a first local maximum in the lower stratosphere around 68 hPa and a second local maximum in the middle stratosphere around 15 hPa. These have been referred to as the interannual variability of the stratospheric water vapor tape recorder (e.g., Geller et al., 2002; Liang et al., 2011) and [are](#) regulated by QBO. The small interannual water vapor anomalies at the [beginning](#) and [ending](#) months of the data record are results of the [boundary effect of using the difference of running means as a band pass filter](#).

To show the relative importance of ENSO and QBO and their roles in the interannual tropical water vapor anomalies at different pressure levels, Figure 3 shows the R-squared values for the linear regressions between the MLS tropical UTLMS interannual monthly water vapor anomalies and the ENSO or QBO index from 215 hPa to 6 hPa with time lag shifts from 0-24

**Deleted:** may be

**Deleted:** first

**Deleted:** last

**Deleted:** several

**Deleted:** limitation

**Deleted:** the band pass filter

months. Figure 3a (left) is for ENSO ( $WV = X_0 + X_1 \times ENSO$ ) and Fig. 3b (right) is for QBO ( $WV = X_0 + X_1 \times QBO$ ). The time lag shift indicates the number of months that the tropical water vapor anomalies lag the ENSO or QBO index. The maximum time lag of 24 months was chosen due to the fact that 24 months are close to the period of a QBO cycle and the minimum period of an ENSO cycle. Figure 3a indicates the R-squared value for the linear regressions between the tropical water vapor anomalies and the ENSO index is large (~50%) in the upper troposphere, becomes smaller (~10%) at the tropopause (~100 hPa) and is very small (close to zero) in the stratosphere above 80 hPa. This is consistent with the large vertically oriented water vapor anomalies of  $\pm 15\%$  in the upper troposphere that are coincident with several El Nino or La Nina events shown in Fig. 2. This implies that ENSO has a strong impact on the water vapor interannual variability in the upper troposphere and around the tropopause, while its impact on the water vapor interannual variability is very small in the stratosphere. The current finding of the strong impact of ENSO on the water vapor in the upper troposphere and around the tropopause is consistent with several previous studies (Dessler et al., 2014; Gettelman et al., 2001; Liang et al., 2011; Ye et al., 2018) that suggested ENSO can strongly modulate the upper tropospheric water vapor through the convective transport of tropospheric water vapor and the evaporation of cloud ice. In terms of the response time, the highest correlation is at ~3-month lag. This is comparable to the tropospheric temperature response time to the ENSO SST anomaly (Su et al., 2005). The current finding of the weak influence of ENSO on the water vapor anomalies in the lower and middle stratosphere is also consistent with a previous study (Ding and Fu, 2018) that suggested the small effect of ENSO on tropical zonal mean lower stratospheric water vapor is due to the opposite phases of lower stratospheric water vapor anomalies in response to ENSO in the longitudinal direction. This is due to the compensating effect of ENSO on the tropical tropopause temperature anomalies between the western equatorial Pacific and the central equatorial Pacific that reduces the zonal mean



[tropical tropopause temperature anomalies](#) found by [previous studies](#) (Avery et al., 2017; Gettelman et al., 2001; Kiladis et al., 2001; Liang et al., 2011).

Deleted: Liang et al. (2011)

For the linear regressions between the interannual tropical water vapor anomalies and the QBO index, Figure 3b indicates that the QBO influence is small in the upper troposphere but large in the lower and middle stratosphere. The high correlation between the tropical water vapor anomalies and the 50-hPa QBO index starts at the tropopause at a time lag of ~2 months and propagates upwards, peaking in the middle stratosphere at ~15 hPa with a time lag of ~21 months. The peak at ~15 hPa with a time lag of ~8 months is the result of the upward propagating signal starting at the tropopause at a time lag of a few months earlier than the 50-hPa QBO index. [These phase lags are consistent with the findings of previous studies \(Dessler et al., 2013; 2014; Ye et al., 2018\). The time lag of ~2 months for the high correlation between the tropical tropopause water vapor anomalies and the 50-hPa QBO index is similar to the time needed for the QBO signal to propagate downward from the 50-hPa level to the tropopause \(Tweedy et al., 2017\). This confirms that the QBO's impact on the stratospheric water vapor is from its modulation on the tropical tropopause temperature, as suggested by many previous studies \(e.g., Diallo et al., 2018; Fueglistaler et al., 2009; Liang et al., 2011; Randel et al., 2004; Tweedy et al., 2017; Zhou et al., 2001, 2004\). This is also consistent with the upward propagating tropical water vapor anomalies of ±15% in the lower and middle stratosphere shown in Fig. 2 and referred to as the interannual variability of the stratospheric water vapor tape recorder \(e.g., Geller et al., 2002; Liang et al., 2011\). This indicates that the interannual variability of the stratospheric water vapor tape recorder \(e.g., Geller et al., 2002; Liang et al., 2011\) is a result of the impact of QBO. It is possible that the interannual variations of the BDC play a role here too because the QBO modulates the extratropical wave activity, an important driver for the BDC, which influences the tropical cold point tropopause temperature.](#)

Deleted: 30

Deleted: -3

Deleted: first in the lower stratosphere at ~68 hPa at a time lag of ~7 months and then

Deleted: 4

Deleted: 12

Deleted: 30

Deleted: suggests

Deleted: s

Deleted: might be

Figure 4 shows the time series of the monthly interannual tropical MLS water vapor anomalies (blue lines) and the predicted interannual monthly tropical water vapor anomalies based on the univariate linear regressions on the ENSO index only (red lines) or the QBO index only (orange lines) at the time lag less than 12 months with the highest R-squared value for four specific pressure levels: 147-hPa, 100-hPa, 68-hPa, 15-hPa, representing the upper troposphere, tropopause, lower stratosphere, and mid-stratosphere, respectively. Figure 4 reaffirms the results shown in Fig. 3: the decreasing contributions of ENSO and the increasing contributions of QBO to the interannual variability of UTLMS water vapor as the altitude increases. The R-squared value for the linear regressions between the MLS interannual tropical water vapor anomalies and the ENSO index is ~54% at the 147-hPa altitude with a ~3-month time lag, ~8% at the tropopause with a ~11-month time lag, and decreases to ~1% at the 68-hPa altitude with a ~12-month time lag and ~2% at the 15-hPa altitude with a ~6-month time lag. In contrast, the R-squared value for the linear regressions between the MLS interannual tropical water vapor anomalies and the QBO index is small (~3%) at the 147-hPa altitude with a ~0-month time lag, becomes significant and large (~46%) at the tropopause with a ~2-month time lag, (~44%) at the 68-hPa altitude with a ~5-month time lag and (~52%) at the 15-hPa altitude with a ~8-month time lag. Therefore, the interannual variability of the UTLMS tropical water vapor is mainly modulated by ENSO instead of QBO in the upper troposphere (from ~215 hPa to ~120 hPa), by both ENSO and QBO around the tropopause (from ~110 hPa to ~90 hPa), and mainly by QBO instead of ENSO in the lower and middle stratosphere (from ~80 hPa to 6 hPa). This result is consistent with many previous studies. For example, Tweedy et al. (2017) and Diallo et al. (2018) have shown that the sudden shift in the QBO from westerly to easterly wind shear in the boreal winter of 2015–2016 significantly decreased global lower stratospheric water vapor from early spring to late autumn and reversed the lower stratosphere moistening to the lower stratosphere drying. Their results imply that QBO is more important than ENSO in modulating the lower-stratospheric water vapor.

- Deleted: 5
- Deleted: 38
- Deleted: 5
- Deleted: reaches the first maximum
- Deleted: 44
- Deleted: 8
- Deleted: the second maximum
- Deleted: 60
- Deleted: 11
- Deleted: mainly

Figure 4 also shows the predicted monthly interannual tropical water vapor anomalies based on the multivariate linear regressions on the ENSO and QBO indices together (purple lines) and the differences (green lines) between the original MLS interannual monthly tropical water vapor anomalies (blue lines) and the multivariate linear regression (purple lines) at the four specific pressure levels. Fig. 4 indicates that the predicted interannual monthly tropical water vapor anomalies based on the multivariate linear regressions of ENSO and QBO are very similar to the original MLS interannual monthly tropical water vapor anomalies. ENSO and QBO together can explain most variance of the interannual monthly tropical water vapor anomalies, ~55% at the 147-hPa altitude, ~47% at the tropopause, ~45% at the 68-hPa altitude, and ~52% at the 15-hPa altitude. However, large residues are still evident in Fig. 4 indicating that nonlinear ENSO-QBO interactions and other physical processes (e.g., BDC) as well as their interactions may be considered in order to explain the full interannual variability of the tropical UTLMS water vapor. This issue is beyond the scope of this paper and will be investigated in the future.

To highlight the different roles of ENSO and QBO phases in the interannual tropical water vapor anomalies at different pressure levels and different seasons, Figure 5 shows the composite interannual tropical water vapor anomalies from MLS as function of pressure levels for winter (NDJFMA) (blue lines), summer (MJJASO) (red lines), and annual (black lines) means at four different cases based on different combinations of ENSO and QBO phases. Consistent with Figs. 3 and 4, Figure 5 shows that ENSO mainly impacts the interannual tropical water vapor anomalies in the upper troposphere and at the tropopause, while QBO mainly affects the interannual tropical water vapor anomalies at the tropopause and in the lower and middle stratosphere. In the upper troposphere (215-120 hPa), the interannual tropical water vapor anomalies are mainly determined by the ENSO phase and its seasonal change while the

Deleted: 6

Deleted: 3

Deleted: 4

Deleted: 60

Deleted: nonlinear

Deleted: other processes, such as the BDC, in addition to ENSO and QBO has to

QBO's effect [seems to be small](#). Positive interannual tropical water vapor anomalies are found during the warm ENSO phases, while negative interannual tropical water vapor anomalies are found during the cold ENSO phases for the annual, winter and summer means no matter what QBO phases are. [However, exception exist for the summer and the cold easterly QBO case but the sampling for this case is low and we have to interpret this result with caution. This is consistent with the aforementioned mechanism that ENSO impacts the upper tropospheric water vapor through the convective transport of water vapor](#) (e.g., Jiang et al., 2015). The interannual tropical water vapor anomalies tend to [be larger](#) during the winter than during the summer because the ENSO events are usually stronger during the winter than during the summer (Wallace et al., 1998).

**Deleted:** is negligible

**Deleted:** For example, p

**Deleted:** (e.g. Jiang et al, 2015)

**Deleted:** During the La Nina cases, it seems that easterly QBO tends to reduce the magnitudes of the negative interannual tropical water vapor anomalies. For example, the averaged interannual tropical water vapor anomalies in the upper troposphere for the summer and the cold easterly QBO case are rather small.

Near the tropopause (110-90 hPa), both ENSO and QBO as well as their season changes can influence the interannual tropical water vapor anomalies. Both warm ENSO phase and westerly QBO phase tend to cause positive interannual tropical water vapor anomalies while cold ENSO phase and easterly QBO phase tend to cause negative interannual tropical water vapor anomalies in this layer. As a result, different interannual tropical water vapor anomalies are found for different cases depending the different ENSO and QBO phase combinations and their seasonal variations in this layer (Liang et al., 2011). For example, very strong positive interannual tropical water vapor anomalies are found for the warm westerly case and very strong negative interannual tropical water vapor anomalies are found for the cold easterly case due to the supporting effect of ENSO and QBO for the winter season. Weak interannual tropical water vapor anomalies are found for the warm easterly case and the cold westerly case due to the compensating effect of ENSO and QBO. [This result is consistent with those results found by Diallo et al. \(2018\) and Liang et al. \(2011\) that emphasized the importance of the interaction of ENSO and QBO phases in controlling the tropical tropopause water vapor anomalies.](#)

However, Diallo et al. (2018) focused on the lower stratosphere, different from the tropopause layer we discussed here.

In the lower and middle stratosphere (80-6 hPa), QBO and its seasonal change dominate the interannual tropical water vapor anomalies while the ENSO's effect is negligible. QBO explains ~50-60%, in contrast to ~2% by ENSO, of the tropical water vapor interannual variance. As discussed earlier, this result seems to be consistent with Tweedy et al. (2017) and Diallo et al. (2018) but not with Avery et al. (2017). During the westerly QBO phases, interannual tropical water vapor anomalies are positive near the tropopause and in the lower stratosphere (below ~50-hPa altitude), negative in the lower and middle stratosphere (between ~50-hPa and ~20-hPa altitude), and positive again in the middle stratosphere (above ~20-hPa altitude) for all seasons. The opposite occurs during the easterly QBO phases. The sign reversal of the interannual tropical water vapor anomalies along the pressure levels in Fig. 5 are consistent with the upward propagating water vapor anomalies and the R-squared values shown in Figs. 2 and 3b. There are some differences in interannual tropical water vapor anomalies between warm and cold ENSO phases and between the summer and winter seasons, but they are relatively small.

#### 4 Summary and Conclusions

In this study, we have analyzed the Aura MLS tropical UTLMS monthly water vapor data from 215 hPa to 6 hPa and from August 2004 to September 2017 using time-lag regression analysis and composite analysis to explore the interannual variations of water vapor in the whole tropical UTLMS layer and their connections to ENSO and QBO. The main findings of our analysis are summarized below.

Deleted: seems to be

Formatted: Highlight

Deleted: below

Deleted: 3

Deleted: 30

The interannual variability of the tropical UTLMS water vapor is mainly modulated by ENSO instead of QBO in the upper troposphere (from ~215 hPa to ~120 hPa), by both ENSO and QBO around the tropopause (from ~110 hPa to ~90 hPa), and by QBO instead of ENSO in the lower and middle stratosphere (from ~80 hPa to ~6 hPa).

5

In the upper troposphere (215-120 hPa), the interannual tropical water vapor anomalies are primarily determined by ENSO and its seasonal change with a ~3-month time lag while the QBO's effect is negligible. ENSO explains ~54%, in contrast to ~3% by QBO, of the interannual tropical water vapor variance. ENSO modulates the upper tropospheric water vapor mainly through the convective transport of tropospheric water vapor and the evaporation of cloud ice. Positive interannual tropical water vapor anomalies are found during the warm ENSO phases, while negative interannual tropical water vapor anomalies are found during the cold ENSO phases for all seasons although the interannual tropical water vapor anomalies tend to larger during the winter than during the summer.

10

15

Near the tropopause (110-90 hPa), both ENSO and QBO as well as their seasonal changes are important for the interannual tropical water vapor anomalies. ENSO explains ~8% while QBO explains ~46% of the interannual tropical water vapor variance. ENSO can modulate the tropical tropopause water vapor through the convective transport of tropospheric water vapor, the evaporation of cloud ice, and its impact on the tropical tropopause temperature. In contrast, QBO modulates the tropical tropopause water vapor mainly by its modulation of the tropical tropopause temperature. Both warm ENSO phase and westerly QBO phase tend to cause positive interannual tropical water vapor anomalies while both cold ENSO phase and easterly QBO phase tend to cause negative interannual tropical water vapor anomalies. As a result, different interannual tropical water vapor anomalies are found for different combinations of ENSO and QBO phases and their seasonal variations. For example, very strong positive

20

25

Deleted: 5

Deleted: 5

Deleted: 38

Deleted: positive

interannual tropical water vapor anomalies are found for the warm westerly case and very strong negative interannual tropical water vapor anomalies are found for the cold easterly case due to the compatible effects of ENSO and QBO for the winter season. Weak interannual tropical water vapor anomalies are found for the warm easterly case and the cold westerly case due to the compensating effects of ENSO and QBO. This emphasized the importance of the interaction of ENSO and QBO phases in controlling the tropical tropopause water vapor anomalies.

In the lower and middle stratosphere (80-6 hPa), QBO and its seasonal change dominate the interannual monthly water vapor anomalies while the ENSO's effect is negligible. QBO explains ~50-60%, in contrast to ~2% by ENSO, of the interannual tropical water vapor variance. QBO modulates the tropical lower and middle stratospheric water vapor mainly by its modulation of the tropical tropopause temperature. During the westerly QBO phase, interannual tropical water vapor anomalies are positive near the tropopause and in the lower stratosphere (below ~50-hPa altitude), negative in the lower and middle stratosphere ((between ~50-hPa and ~20-hPa altitude), and positive again in the middle stratosphere (above ~20-hPa altitude) for all seasons. The opposite occurs during the easterly QBO phase. There are some small differences in interannual tropical water vapor anomalies between warm and cold ENSO phases and between the summer and winter seasons.

In summary, ENSO has a strong impact on the interannual variations of tropical water vapor below 90-hPa altitude, i.e., in the upper troposphere and at the tropopause. On the other hand, QBO has a large impact on the interannual variations of tropical water vapor above 110-hPa, i.e., at the tropopause and in the lower and middle stratosphere. ENSO and QBO together can explain most but not all the interannual variations of the tropical UTLMS water vapor. Nonlinear ENSO-QBO interactions and other physical processes (e.g., BDC), as well as their

Deleted: below ~30

Deleted: 30

Deleted: Other

Deleted: , such as the

Deleted: ,



[interactions may](#) be considered [in future investigations](#) in order to fully explain the interannual variability of the tropical UTLMS water vapor.

Deleted: nonlinear

Deleted: has to

The findings in the current study are generally consistent with those from previous studies (e.g.,

5 Dessler et al., 2014; [Diallo et al., 2018](#); Ding and Fu, 2018; Liang et al., 2011; [Tweedy et al., 2017](#); Ye et al., 2018). However, the relative roles of ENSO and QBO on the tropical UTLMS water vapor interannual variabilities for the entire UTLMS layer and at different phase lags [and different pressure levels](#) are more completely investigated in the current study than the previous ones. These results can serve as an important benchmark for future climate model  
10 evaluation studies.

Formatted: Highlight

Formatted: Highlight

#### Data availability

The MLS water vapor data used in this research are freely available through the Aura MLS project website (<https://mls.jpl.nasa.gov>). The multivariate ENSO indices used in this research are freely available from the NOAA [Earth System Research Laboratory \(ESRL\)](#) website  
15 (<https://www.esrl.noaa.gov/psd/enso/mei/>). The [50-hPa](#) QBO indices used in this research are also freely available from the NOAA [NCEP Climate Prediction Center \(CPC\)](#) website (<http://www.cpc.ncep.noaa.gov/data/indices/qbo.u50.index>).

Deleted: <https://www.esrl.noaa.gov/psd/data/correlation/qbo.data>

#### Author contributions

JHJ, HS, and BT designed this study. EWT performed the data analysis and prepared the figures.

20 All authors contributed to the discussion of the [results](#) and the preparation of the manuscript.

#### Competing interests

The authors declare that they have no conflict of interests.

## Acknowledgments

This research was performed at Jet Propulsion Laboratory, California Institute of Technology (Caltech), under a contract with National Aeronautics and Space Administration. It was supported by the Aura Microwave Limb Sounder project. [The authors thank Dr. Andrew Dessler, Dr. Michaela Hegglin, and two anonymous referees for their constructive and insightful comments that helped to improve the quality of this paper.](#) The first author [also](#) thanks Matthew Worden for his help with the MATLAB code. Caltech Copyright 2019. All rights reserved.

Deleted: 8

## References

- 10 Avery, M. A., Davis, S. M., Rosenlof, K. H., Ye, H., and Dessler, A. E.: Large anomalies in lower stratospheric water vapour and ice during the 2015-2016 El Nino, *Nature Geosci.*, 10, 405-+, doi:10.1038/ngeo2961, 2017.
- Baldwin, M. P., Gray, L. J., Dunkerton, T. J., Hamilton, K., Haynes, P. H., Randel, W. J., Holton, J. R., Alexander, M. J., Hirota, I., Horinouchi, T., Jones, D. B. A., Kinnersley, J. S., Marquardt, C., Sato, K., and Takahashi, M.: The quasi-biennial oscillation, *Rev. Geophys.*, 39, 179-229, doi:10.1029/1999rg000073, 2001.
- 15 Brewer, A. W.: Evidence for a world circulation provided by the measurements of helium and water vapour distribution in the stratosphere, *Q. J. Roy. Meteor. Soc.*, 75, 351-363, doi:10.1002/qj.49707532603, 1949.
- 20 Butchart, N.: The Brewer-Dobson circulation, *Rev. Geophys.*, 52, 157-184, doi:10.1002/2013rg000448, 2014.
- Calvo, N., Garcia, R. R., Randel, W. J., and Marsh, D. R.: Dynamical Mechanism for the Increase in Tropical Upwelling in the Lowermost Tropical Stratosphere during Warm ENSO Events, *J. Atmos. Sci.*, 67, 2331-2340, doi:10.1175/2010jas3433.1, 2010.
- 25 Choi, W., Lee, H., Grant, W. B., Park, J. H., Holton, J. R., Lee, K. M., and Naujokat, B.: On the secondary meridional circulation associated with the quasi-biennial oscillation, *Tellus B*, 54, 395-406, doi:10.1034/j.1600-0889.2002.201286.x, 2002.

- Dessler, A. E., Schoeberl, M. R., Wang, T., Davis, S. M., and Rosenlof, K. H.: Stratospheric water vapor feedback, *Proc. Nat. Acad. Sci. USA*, 110, 18087-18091, doi:10.1073/pnas.1310344110, 2013.
- Dessler, A. E., Schoeberl, M. R., Wang, T., Davis, S. M., Rosenlof, K. H., and Vernier, J. P.: Variations of stratospheric water vapor over the past three decades, *J. Geophys. Res.*, 119, 12588-12598, doi:10.1002/2014jd021712, 2014.
- Diallo, M., Riese, M., Birner, T., Konopka, P., Muller, R., Hegglin, M. I., Santee, M. L., Baldwin, M., Legras, B., and Ploeger, F.: Response of stratospheric water vapor and ozone to the unusual timing of El Nino and the QBO disruption in 2015-2016, *Atm. Chem. Phys.*, 18, 13055-13073, doi:10.5194/acp-18-13055-2018, 2018.
- 10 Ding, Q. H., and Fu, Q.: A warming tropical central Pacific dries the lower stratosphere, *Clim. Dyn.*, 50, 2813-2827, doi:10.1007/s00382-017-3774-y, 2018.
- Flury, T., Wu, D. L., and Read, W. G.: Correlation among cirrus ice content, water vapor and temperature in the TTL as observed by CALIPSO and Aura/MLS, *Atm. Chem. Phys.*, 12, 683-691, doi:10.5194/acp-12-683-2012, 2012.
- 15 Forster, P. M. D., and Shine, K. P.: Stratospheric water vapour changes as a possible contributor to observed stratospheric cooling, *Geophys. Res. Lett.*, 26, 3309-3312, doi:10.1029/1999GL010487, 1999.
- Fueglistaler, S., and Haynes, P. H.: Control of interannual and longer-term variability of stratospheric water vapor, *J. Geophys. Res.*, 110, 14, doi:10.1029/2005jd006019, 2005.
- 20 Fueglistaler, S., Dessler, A. E., Dunkerton, T. J., Folkins, I., Fu, Q., and Mote, P. W.: Tropical tropopause layer, *Rev. Geophys.*, 47, 31, doi:10.1029/2008rg000267, 2009.
- Fujiwara, M., Vomel, H., Hasebe, F., Shiotani, M., Ogino, S. Y., Iwasaki, S., Nishi, N., Shibata, T., Shimizu, K., Nishimoto, E., Canossa, J. M. V., Selkirk, H. B., and Oltmans, S. J.: Seasonal to decadal variations of water vapor in the tropical lower stratosphere observed with balloon-borne cryogenic frost point hygrometers, *J. Geophys. Res.*, 115, 15, doi:10.1029/2010jd014179, 2010.
- Geller, M. A., Zhou, X. L., and Zhang, M. H.: Simulations of the interannual variability of stratospheric water vapor, *J. Atmos. Sci.*, 59, 1076-1085, doi:10.1175/1520-0469(2002)059<1076:Sotivo>2.0.Co;2, 2002.
- 30 Gettelman, A., Randel, W. J., Massie, S., Wu, F., Read, W. G., and Russell, J. M.: El Nino as a natural experiment for studying the tropical tropopause region, *J. Climate*, 14, 3375-3392, doi:10.1175/1520-0442(2001)014<3375:enoan>2.0.co;2, 2001.

- Hegglin, M. I., Tegtmeier, S., Anderson, J., Froidevaux, L., Fuller, R., Funke, B., Jones, A., Lingenfelter, G., Lumpe, J., Pendlebury, D., Remsberg, E., Rozanov, A., Toohey, M., Urban, J., von Clarmann, T., Walker, K. A., Wang, R., and Weigel, K.: SPARC Data Initiative: Comparison of water vapor climatologies from international satellite limb sounders, *J. Geophys. Res.*, 118, doi:10.1002/jgrd.50752, 2013.
- Hegglin, M. I., Plummer, D. A., Shepherd, T. G., Scinocca, J. F., Anderson, J., Froidevaux, L., Funke, B., Hurst, D., Rozanov, A., Urban, J., von Clarmann, T., Walker, K. A., Wang, H. J., Tegtmeier, S., and Weigel, K.: Vertical structure of stratospheric water vapour trends derived from merged satellite data, *Nature Geosci.*, 7, 768-776, doi:10.1038/ngeo2236, 2014.
- 10 Held, I. M., and Soden, B. J.: Water vapor feedback and global warming, *Ann. Rev. En. & Env.*, 25, 441-475, doi:10.1146/annurev.energy.25.1.441, 2000.
- Huang, B., L'Heureux, M., Hu, Z.-Z., and Zhang, H.-M.: Ranking the strongest ENSO events while incorporating SST uncertainty, *Geophys. Res. Lett.*, 43, 9165-9172, doi:10.1002/2016gl070888, 2016.
- 15 Jiang, J. H., Su, H., Zhai, C. X., Perun, V. S., Del Genio, A., Nazarenko, L. S., Donner, L. J., Horowitz, L., Seman, C., Cole, J., Gettelman, A., Ringer, M. A., Rotstayn, L., Jeffrey, S., Wu, T. W., Brient, F., Dufresne, J. L., Kawai, H., Koshiro, T., Watanabe, M., Lecuyer, T. S., Volodin, E. M., Iversen, T., Drange, H., Mesquita, M. D. S., Read, W. G., Waters, J. W., Tian, B. J., Teixeira, J., and Stephens, G. L.: Evaluation of cloud and water vapor simulations in CMIP5 climate models using NASA "A-Train" satellite observations, *J. Geophys. Res.*, 117, 24, doi:10.1029/2011jd017237, 2012.
- 20 Jiang, J. H., Su, H., Zhai, C. X., Wu, L. T., Minschwaner, K., Molod, A. M., and Tompkins, A. M.: An assessment of upper troposphere and lower stratosphere water vapor in MERRA, MERRA2, and ECMWF reanalyses using Aura MLS observations, *J. Geophys. Res.*, 120, 18, doi:10.1002/2015jd023752, 2015.
- 25 Kiladis, G. N., Straub, K. H., Reid, G. C., and Gage, K. S.: Aspects of interannual and intraseasonal variability of the tropopause and lower stratosphere, *Q. J. Roy. Meteor. Soc.*, 127, 1961-1983, doi:10.1256/smsqj.57605, 2001.
- Konopka, P., Ploeger, F., Tao, M. C., and Riese, M.: Zonally resolved impact of ENSO on the stratospheric circulation and water vapor entry values, *J. Geophys. Res.*, 121, 11486-11501, doi:10.1002/2015jd024698, 2016.
- 30 Lambert, A., Read, W. G., Livesey, N. J., Santee, M. L., Manney, G. L., Froidevaux, L., Wu, D. L., Schwartz, M. J., Pumphrey, H. C., Jimenez, C., Nedoluha, G. E., Cofield, R. E., Cuddy, D. T., Daffer, W. H., Drouin, B. J., Fuller, R. A., Jarnot, R. F., Knosp, B. W., Pickett, H. M., Perun, V. S., Snyder, W. V., Stek, P. C., Thurstans, R. P., Wagner, P. A., Waters, J. W., Jucks, K. W., Toon, G. C., Stachnik, R. A., Bernath, P. F., Boone, C. D., Walker, K. A., Urban, J., Murtagh, D., Elkins, J. W., and Atlas, E.:

- Validation of the Aura Microwave Limb Sounder middle atmosphere water vapor and nitrous oxide measurements, *J. Geophys. Res.*, 112, 24, doi:10.1029/2007jd008724, 2007.
- Liang, C. K., Eldering, A., Gettelman, A., Tian, B., Wong, S., Fetzer, E. J., and Liou, K. N.: Record of tropical interannual variability of temperature and water vapor from a combined AIRS-MLS data set, *J. Geophys. Res.*, 116, 19, doi:10.1029/2010jd014841, 2011.
- Liess, S., and Geller, M. A.: On the relationship between QBO and distribution of tropical deep convection, *J. Geophys. Res.*, 117, 12, doi:10.1029/2011jd016317, 2012.
- Lindzen, R. S., and Holton, J. R.: A THEORY OF QUASI-BIENNIAL OSCILLATION, *J. Atmos. Sci.*, 25, 1095-1108, doi:10.1175/1520-0469(1968)025<1095:atotqb>2.0.co;2, 1968.
- 10 Liu, R., Su, H., Liou, K. N., Jiang, J. H., Gu, Y., Liu, S. C., and Shiu, C. J.: An Assessment of Tropospheric Water Vapor Feedback Using Radiative Kernels, *J. Geophys. Res.*, 123, 1499-1509, doi:10.1002/2017jd027512, 2018.
- Livesey, N. J.: EOS Aura MLS Version 4.2x Level 2 data quality and description document, Tech. Rep., D-33509, Rev. A, Jet Propulsion Laboratory, California Institute of Technology, 2015.
- 15 Mote, P. W., Rosenlof, K. H., McIntyre, M. E., Carr, E. S., Gille, J. C., Holton, J. R., Kinnersley, J. S., Pumphrey, H. C., Russell, J. M., and Waters, J. W.: An atmospheric tape recorder: The imprint of tropical tropopause temperatures on stratospheric water vapor, *J. Geophys. Res.*, 101, 3989-4006, doi:10.1029/95jd03422, 1996.
- Newman, P. A., Coy, L., Pawson, S., and Lait, L. R.: The anomalous change in the QBO in 2015-2016, *Geophys. Res. Lett.*, 43, 8791-8797, doi:10.1002/2016gl070373, 2016.
- 20 Osprey, S. M., Butchart, N., Knight, J. R., Scaife, A. A., Hamilton, K., Anstey, J. A., Schenzinger, V., and Zhang, C. X.: An unexpected disruption of the atmospheric quasi-biennial oscillation, *Science*, 353, 1424-1427, doi:10.1126/science.aah4156, 2016.
- Philander, S. G. H.: El Nino, La Nina, and the Southern Oscillation, International Geophysical Series, 25 Academic Press, San Diego, CA, USA, 293 pp., 1990.
- Randel, W. J., Wu, F., Oltmans, S. J., Rosenlof, K., and Nedoluha, G. E.: Interannual changes of stratospheric water vapor and correlations with tropical tropopause temperatures, *J. Atmos. Sci.*, 61, 2133-2148, doi:10.1175/1520-0469(2004)061<2133:icoswv>2.0.co;2, 2004.
- 30 Randel, W. J., Wu, F., Vomel, H., Nedoluha, G. E., and Forster, P.: Decreases in stratospheric water vapor after 2001: Links to changes in the tropical tropopause and the Brewer-Dobson circulation, *J. Geophys. Res.*, 111, 11, doi:10.1029/2005jd006744, 2006.

- Randel, W. J., Garcia, R. R., Calvo, N., and Marsh, D.: ENSO influence on zonal mean temperature and ozone in the tropical lower stratosphere, *Geophys. Res. Lett.*, 36, 5, doi:10.1029/2009gl039343, 2009.
- 5 Randel, W. J., and Jensen, E. J.: Physical processes in the tropical tropopause layer and their roles in a changing climate, *Nature Geosci.*, 6, 169-176, doi:10.1038/ngeo1733, 2013.
- Read, W. G., Lambert, A., Bacmeister, J., Cofield, R. E., Christensen, L. E., Cuddy, D. T., Daffer, W. H., Drouin, B. J., Fetzer, E., Froidevaux, L., Fuller, R., Herman, R., Jarnot, R. F., Jiang, J. H., Jiang, Y. B., Kelly, K., Knosp, B. W., Kovalenko, L. J., Livesey, N. J., Liu, H. C., Manney, G. L., Pickett, H. M., Pumphrey, H. C., Rosenlof, K. H., Sabouchi, X., Santee, M. L., Schwartz, M. J., Snyder, W. V., Stek, 10 P. C., Su, H., Takacs, L. L., Thurstans, R. P., Vomel, H., Wagner, P. A., Waters, J. W., Webster, C. R., Weinstock, E. M., and Wu, D. L.: Aura Microwave Limb Sounder upper tropospheric and lower stratospheric H<sub>2</sub>O and relative humidity with respect to ice validation, *J. Geophys. Res.*, 112, 29, doi:10.1029/2007jd008752, 2007.
- Riese, M., Ploeger, F., Rap, A., Vogel, B., Konopka, P., Dameris, M., and Forster, P.: Impact of 15 uncertainties in atmospheric mixing on simulated UTLS composition and related radiative effects, *J. Geophys. Res.*, 117, 10, doi:10.1029/2012jd017751, 2012.
- Schwartz, M. J., Waliser, D. E., Tian, B., Wu, D. L., Jiang, J. H., and Read, W. G.: Characterization of MJO-related upper tropospheric hydrological processes using MLS, *Geophys. Res. Lett.*, 35, doi:10.1029/2008gl033675, 2008.
- 20 Soden, B. J., and Held, I. M.: An assessment of climate feedbacks in coupled ocean-atmosphere models, *J. Climate*, 19, 3354-3360, doi:10.1175/jcli3799.1, 2006.
- Soden, B. J., Held, I. M., Colman, R., Shell, K. M., Kiehl, J. T., and Shields, C. A.: Quantifying climate feedbacks using radiative kernels, *J. Climate*, 21, 3504-3520, doi:10.1175/2007jcli2110.1, 2008.
- Solomon, S., Rosenlof, K. H., Portmann, R. W., Daniel, J. S., Davis, S. M., Sanford, T. J., and Plattner, 25 G. K.: Contributions of Stratospheric Water Vapor to Decadal Changes in the Rate of Global Warming, *Science*, 327, 1219-1223, doi:10.1126/science.1182488, 2010.
- Su, H., Neelin, J. D., and Meyerson, J. E.: Mechanisms for lagged atmospheric response to ENSO SST forcing, *J. Climate*, 18, 4195-4215, doi:10.1175/jcli3514.1, 2005.
- Su, H., Read, W. G., Jiang, J. H., Waters, J. W., Wu, D. L., and Fetzer, E. J.: Enhanced positive water 30 vapor feedback associated with tropical deep convection: New evidence from Aura MLS, *Geophys. Res. Lett.*, 33, 5, doi:10.1029/2005gl025505, 2006.

- Su, H., and Jiang, J. H.: Tropical Clouds and Circulation Changes during the 2006/07 and 2009/10 El Ninos, *J. Climate*, 26, 399-413, doi:10.1175/jcli-d-12-00152.1, 2013.
- Takahashi, H., Su, H., and Jiang, J. H.: Error analysis of upper tropospheric water vapor in CMIP5 models using "A-Train" satellite observations and reanalysis data, *Clim. Dyn.*, 46, 2787-2803, doi:10.1007/s00382-015-2732-9, 2016.
- Tao, M. C., Konopka, P., Ploeger, F., Riese, M., Muller, R., and Volk, C. M.: Impact of stratospheric major warmings and the quasi-biennial oscillation on the variability of stratospheric water vapor, *Geophys. Res. Lett.*, 42, 4599-4607, doi:10.1002/2015gl064443, 2015.
- Tian, B., Soden, B. J., and Wu, X. Q.: Diurnal cycle of convection, clouds, and water vapor in the tropical upper troposphere: Satellites versus a general circulation model, *J. Geophys. Res.*, 109, 16, doi:10.1029/2003jd004117, 2004.
- Tian, B., Waliser, D. E., Fetzer, E. J., Lambriksen, B. H., Yung, Y. L., and Wang, B.: Vertical moist thermodynamic structure and spatial-temporal evolution of the MJO in AIRS observations, *J. Atmos. Sci.*, 63, 2462-2485, doi:10.1175/jas3782.1, 2006.
- 15 Tian, B., Yung, Y. L., Waliser, D. E., Tyranowski, T., Kuai, L., Fetzer, E. J., and Irion, F. W.: Intraseasonal variations of the tropical total ozone and their connection to the Madden-Julian Oscillation, *Geophys. Res. Lett.*, 34, doi:10.1029/2007gl029451, 2007.
- Tian, B., Waliser, D. E., Fetzer, E. J., and Yung, Y. L.: Vertical moist thermodynamic structure of the Madden-Julian Oscillation in Atmospheric Infrared Sounder retrievals: An update and a comparison to  
20 ECMWF Interim Re-Analysis, *Mon. Wea. Rev.*, 138, 4576-4582, doi:10.1175/2010mwr3486.1, 2010.
- Tian, B., Waliser, D. E., Kahn, R. A., and Wong, S.: Modulation of Atlantic aerosols by the Madden-Julian Oscillation, *J. Geophys. Res.*, 116, 12, doi:10.1029/2010jd015201, 2011.
- Tweedy, O. V., Kramarova, N. A., Strahan, S. E., Newman, P. A., Coy, L., Randel, W. J., Park, M.,  
25 Waugh, D. W., and Frith, S. M.: Response of trace gases to the disrupted 2015-2016 quasi-biennial oscillation, *Atm. Chem. Phys.*, 17, 6813-6823, doi:10.5194/acp-17-6813-2017, 2017.
- Uma, K. N., Das, S. K., and Das, S. S.: A climatological perspective of water vapor at the UTLS region over different global monsoon regions: observations inferred from the Aura-MLS and reanalysis data, *Clim. Dyn.*, 43, 407-420, doi:10.1007/s00382-014-2085-9, 2014.
- Wallace, J. M., Rasmusson, E. M., Mitchell, T. P., Kousky, V. E., Sarachik, E. S., and von Storch, H.:  
30 The structure and evolution of ENSO-related climate variability in the tropical Pacific: Lessons from TOGA, *J. Geophys. Res.*, 103, 14241-14259, doi:10.1029/97jc02905, 1998.

Wolter, K., and Timlin, M. S.: El Nino/Southern Oscillation behaviour since 1871 as diagnosed in an extended multivariate ENSO index (MEI.ext), *Int. J. Clim.*, 31, 1074-1087, doi:10.1002/joc.2336, 2011.

Wu, L., Su, H., Jiang, J. H., and Read, W. G.: Hydration or dehydration: competing effects of upper tropospheric cloud radiation on the TTL water vapor, *Atm. Chem. Phys.*, 12, 7727-7735, doi:10.5194/acp-12-7727-2012, 2012.

Ye, H., Dessler, A. E., and Yu, W. D.: Effects of convective ice evaporation on interannual variability of tropical tropopause layer water vapor, *Atm. Chem. Phys.*, 18, 4425-4437, doi:10.5194/acp-18-4425-2018, 2018.

Zhou, X. L., Geller, M. A., and Zhang, M. H.: Tropical cold point tropopause characteristics derived from ECMWF reanalyses and soundings, *J. Climate*, 14, 1823-1838, doi:10.1175/1520-0442(2001)014<1823:tcptcd>2.0.co;2, 2001.

Zhou, X. L., Geller, M. A., and Zhang, M. H.: Temperature fields in the tropical tropopause transition layer, *J. Climate*, 17, 2901-2908, doi:10.1175/1520-0442(2004)017<2901:tfittt>2.0.co;2, 2004.

15



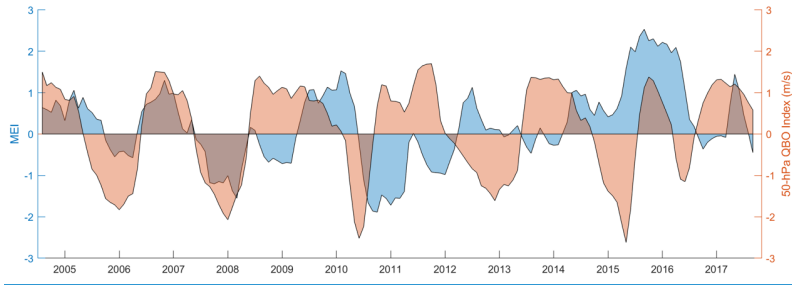

**Figure 1.** Bimonthly multivariate ENSO index (MEI, blue) and monthly 50-hPa QBO index ( $u_{50}$ ,  $m\ s^{-1}$ , orange) based on standardized anomaly of monthly zonal mean zonal wind at the Equator and 50-hPa both from NOAA at the period from August 2004 to September 2017. Positive MEI values indicate warm ENSO (El Niño) phases while negative MEI values indicate cold ENSO (La Niña) phases. Positive  $u_{50}$  values denote westerly QBO phases while negative  $u_{50}$  values denote easterly QBO phases.

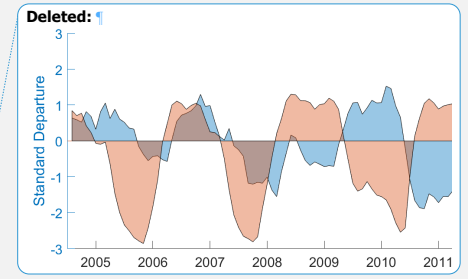

- Deleted: ¶
- Deleted: ) (
- Deleted: 30-hPa zonal mean zonal
- Deleted: ( $u_{30}$ ) (orange)
- Deleted: 30
- Deleted: 30
- Deleted: ¶

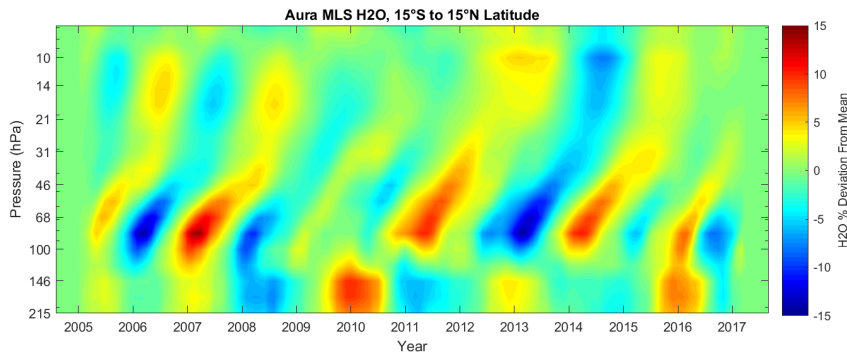

10 **Figure 2.** Monthly interannual tropical water vapor anomalies from MLS in percentage deviations at different pressure levels from August 2004 to September 2017.

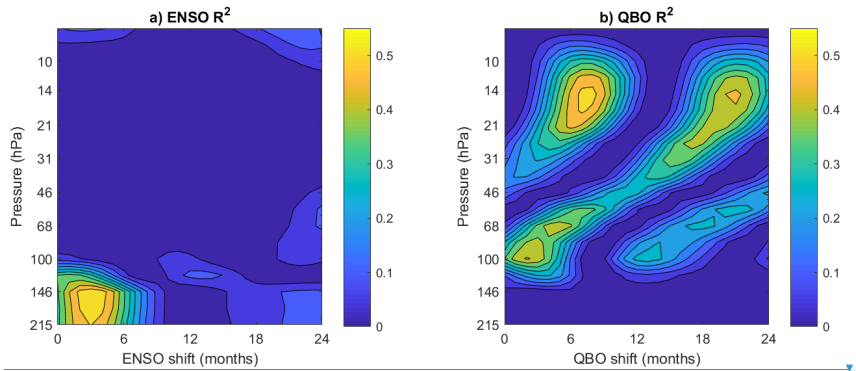

5 **Figure 3.** R-squared values for the linear regressions between the interannual tropical water vapor anomalies from MLS and the ENSO or QBO index at each pressure level with time lag shifts from 0-24 months. Figure 3a (left) is for ENSO ( $WV = X_0 + X_1 \times \text{ENSO}$ ) and Fig. 3b (right) is for QBO ( $WV = X_0 + X_1 \times \text{QBO}$ ). The time lag shift indicates the number of months that interannual tropical water vapor anomalies lag the ENSO or QBO index.

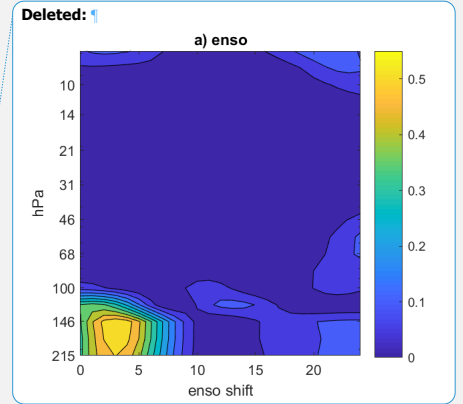

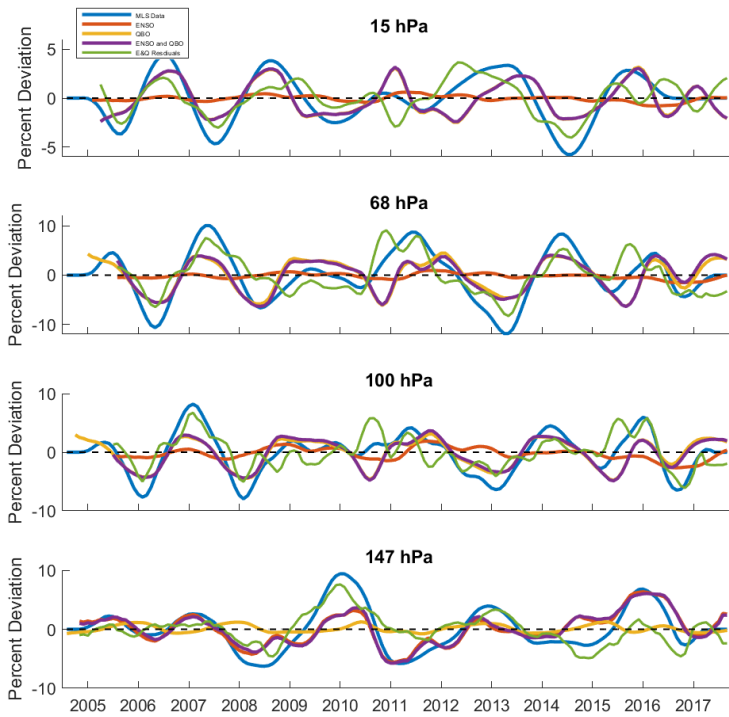

**Figure 4.** The time series of the monthly interannual tropical water vapor anomalies from MLS (blue lines) and the predicted monthly interannual tropical water vapor anomalies based on the linear regressions on the ENSO index only (red lines), the QBO index only (orange lines), and the ENSO and QBO indices together (purple lines) at the time lag less than 12 months with the highest R-squared value for four specific pressure levels: 15 hPa (top row), 68 hPa (second row), 100 hPa (third row), and 147 hPa (bottom row). The differences between the MLS data (blue lines) and the linear regression lines based on the ENSO and QBO together (purple lines) are also plotted (green lines).

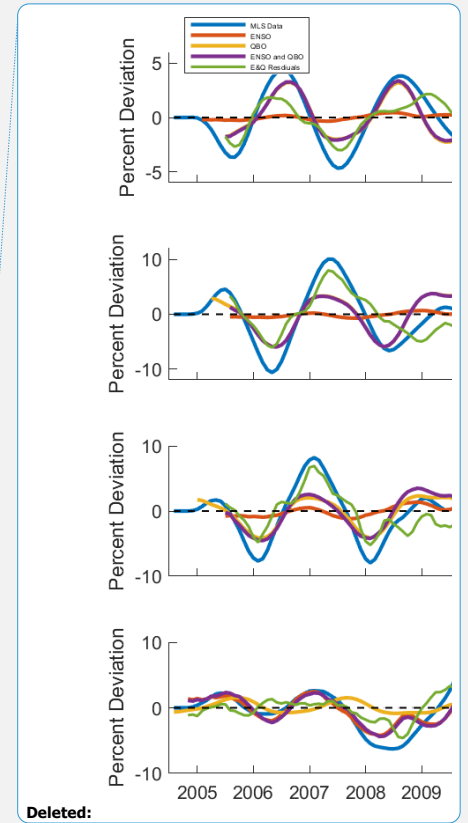

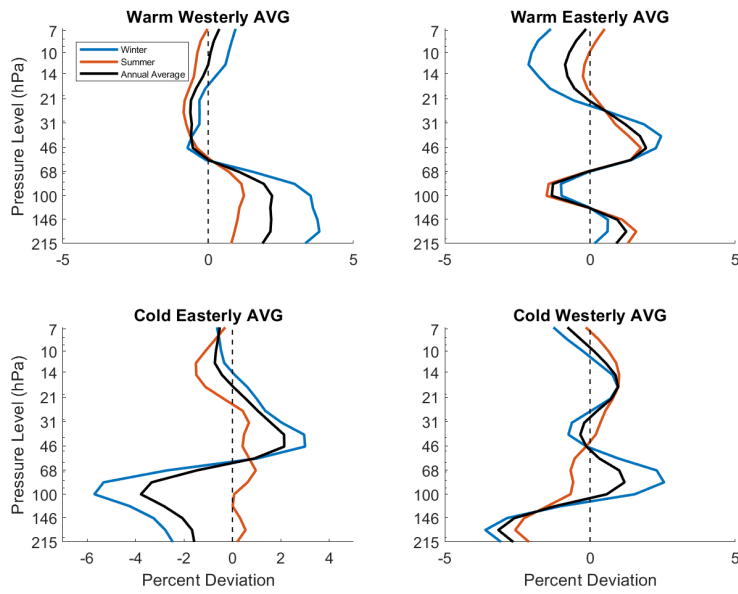

**Figure 5.** Composite interannual tropical water vapor anomalies from MLS at different pressure levels for winter (NDJFMA) (blue lines), summer (MJJASO) (red lines), and annual (black lines) means at four different cases based on different combinations of ENSO and QBO phases.

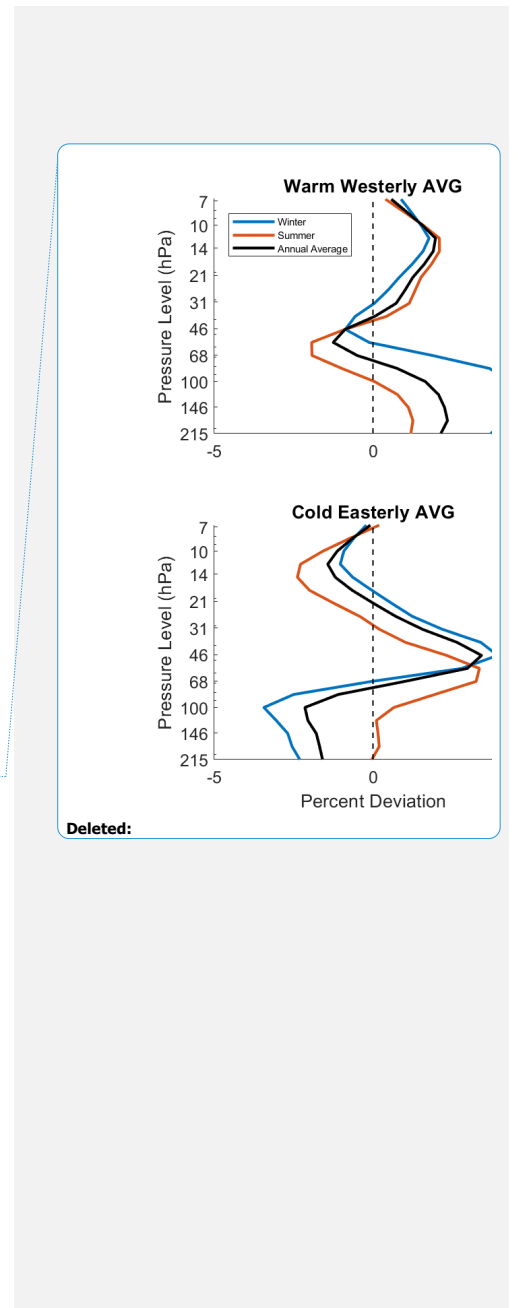

Supplement: Supplementary file [file acp-2018-1010-AC1-supplement.pdf]
